# Supplementary material
Source: PubMed Central journal article supplement (PMC3385980)
Supplement: supp_2.7.741_FigureS1.pdf [file supp_2.7.741_FigureS1.pdf]

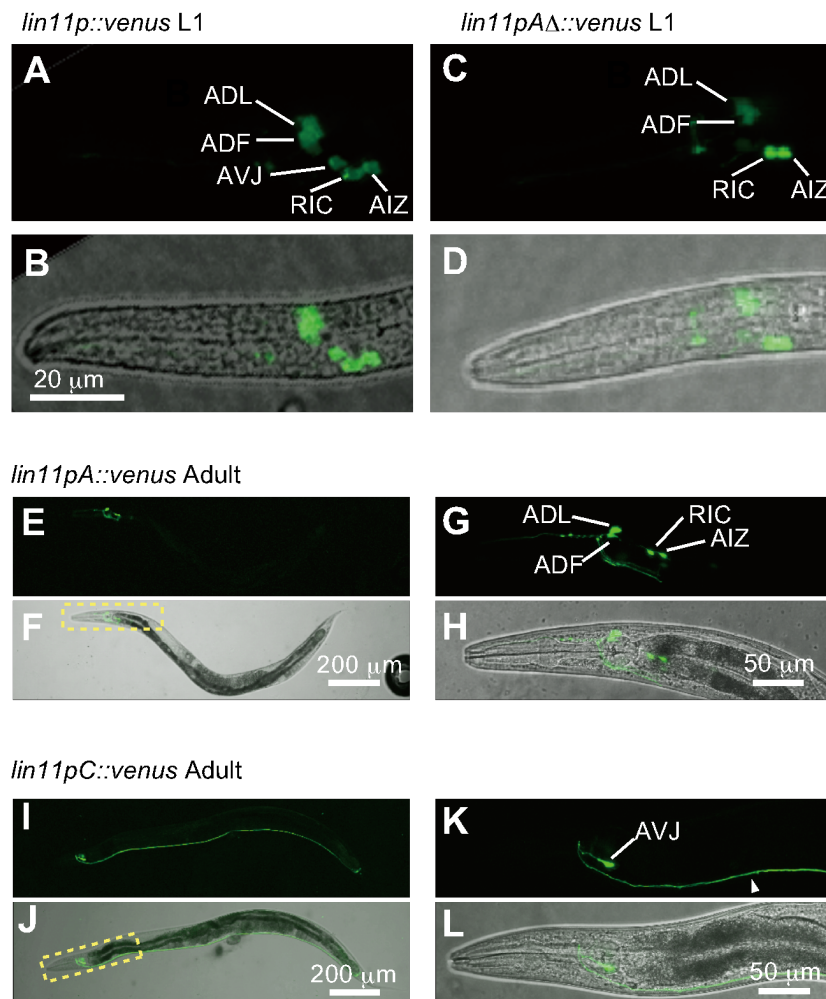

**Figure S1** Expression patterns of synthetic promoters. (A-D) Fluorescent reporter expression by *lin-11p::venus* (A and B) and *lin-11pΔ::venus* (C and D) in the head region of L1 larvae. The fluorescence images (A and C) and images merged with bright field images (B and D) are shown. (E-L) Fluorescent reporter expression by *lin-11pA::venus* (E-H) and *lin-11pC::venus* (I-L) at adult. The fluorescence images (E, G, I, and K) and images merged with bright field images (F, H, J, and L) are shown. G, H, K, and L are magnified images of the region surrounded by yellow squares in F or J.
