# Supplementary material
Source: PubMed Central journal article supplement (PMC3385980)
Supplement: supp_2.7.741_FigureS2.pdf [file supp_2.7.741_FigureS2.pdf]

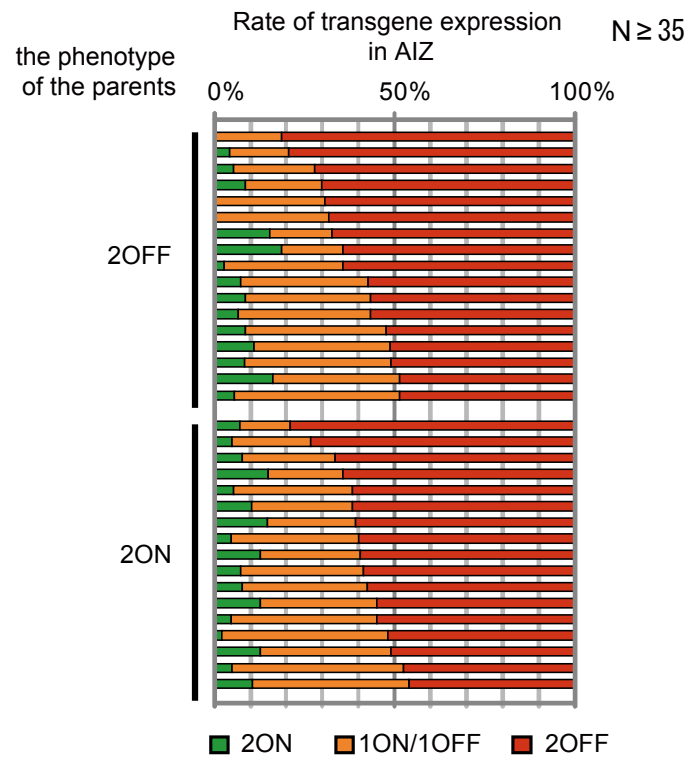

**Figure S2** AIZ phenotypes of individual populations of offspring from isolated *pels304* animals. 17 *pels304* animals with AIZ-2ON and AIZ-2OFF phenotypes were separately isolated. Each animal was self-fertilized and the progeny were tested for the AIZ phenotypes at adult. The distribution of phenotypes is shown for each population. ( $N \geq 35$  for each population)
