# Supplementary material
Source: PubMed Central journal article supplement (PMC3385980)
Supplement: supp_2.7.741_FigureS3.pdf [file supp_2.7.741_FigureS3.pdf]

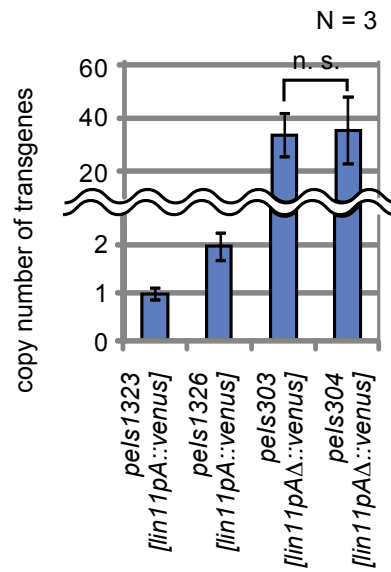

**Figure S3** Copy number of reporter transgenes in the chromosomally integrated transgenes. The relative copy numbers of transgenes were quantified by performing real-time PCR against a sequence in the *venus* gene and the sequence in the *pqe-1* gene in the genome for control. The relative copy numbers were further normalized by that of *pels1323*[*lin-11pA::venus*] which was supposed to be a single-copy insertion. (N = 3, Error bars represent the S.E.M., n.s. indicates that they are not significantly different at P < 0.01 by Student's t test)
