# Supplementary material
Source: PubMed Central journal article supplement (PMC3385980)
Supplement: supp_2.7.741_FigureS4.pdf [file supp_2.7.741_FigureS4.pdf]

*pels304; pqe-1(pe334)*

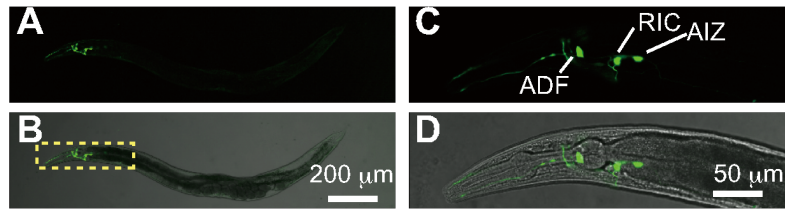

*pels304; pqe-1(pe334)* PQE-1 rescue line

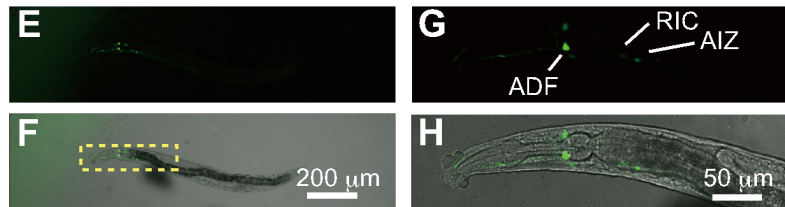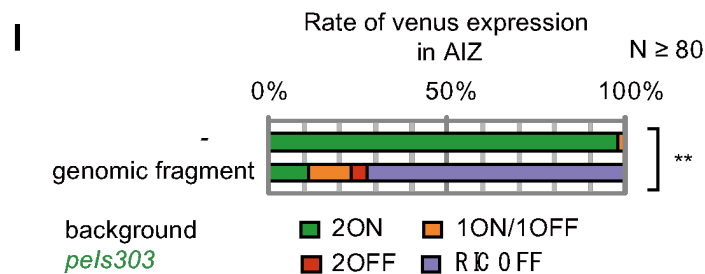

**Figure S4** Overexpression of *pqe-1* represses the reporter expression also in RIC neurons. (A-H) Expression pattern of *pels304* with (E-H) or without (A-D) a rescuing transgene *H20p::pqe-1C*. The fluorescence images (A, C, E, and G) and images merged with bright field images (B, D, F, and H) are shown. C, D, G, and H are magnified images of the region surrounded by yellow squares in B or F. For E-H, an animal with typical RIC OFF phenotype was picked.

(I) AIZ phenotype of *pels303* animals with overexpression of *pqe-1*. The extrachromosomal array which consists of genomic fragment of *pqe-1* was transferred to wild-type *pels303* background from a rescue line of *pqe-1(pe334); pels304* by a cross. The extrachromosomal array only with transformation marker *myo-3p::mRFP* was also transferred to the *pels303* background and used as control. Only the animals that carried the extrachromosomal array were used for the analysis. (N ≥ 60, \*\* shows significant differences at P < 0.001 by Chi-square test.)
