# Supplementary material
Source: PubMed Central journal article supplement (PMC3385980)
Supplement: supp_2.7.741_FigureS5.pdf [file supp_2.7.741_FigureS5.pdf]

**A**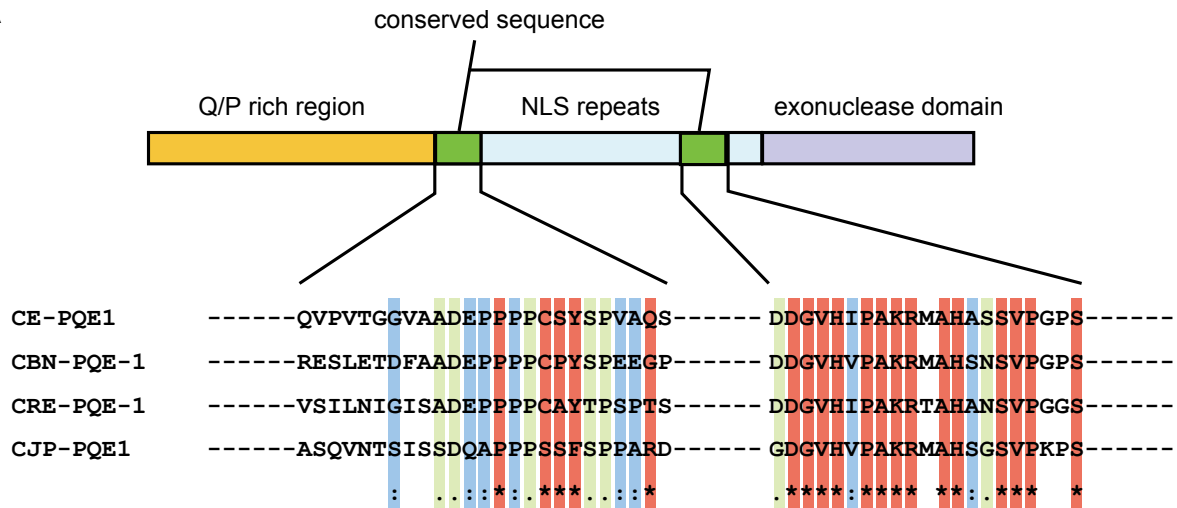**B**

The rate of glutamine(Q) and proline(P) in the Q/P rich region

|     | total a.a. | Q   | P   | Q rate | P rate |
|-----|------------|-----|-----|--------|--------|
| CE  | 572        | 112 | 89  | 0.20   | 0.16   |
| CBN | 614        | 126 | 112 | 0.21   | 0.18   |
| CRE | 572        | 115 | 70  | 0.20   | 0.12   |
| CJP | 383        | 72  | 49  | 0.19   | 0.13   |

**Figure S5** Domain structure of the PQE-1 protein. (A) An illustration of the domain structure of the PQE-1A protein. The PQE-1A isoform has a Q/P rich region, NLS repeats with conserved sequences, and an exonuclease domain. Two short sequences are well conserved in PQE-1 proteins of *Caenorhabditis* species (CE: *elegans*, CBN: *brenneri*, CRE: *remanei*, CJP: *japonica*) and are included in PQE-1A and PQE-1C isoforms. (\*, :, and . indicate fully conserved residue, conservation of a 'strong group', and conservation of a 'weak group', respectively, which are defined in ClustalW.) (B) Number and the content of glutamine, Q, and proline, P, residues in Q/P rich region.
