# Supplementary material
Source: PubMed Central journal article supplement (PMC3385980)
Supplement: supp_2.7.741_FigureS6.pdf [file supp_2.7.741_FigureS6.pdf]

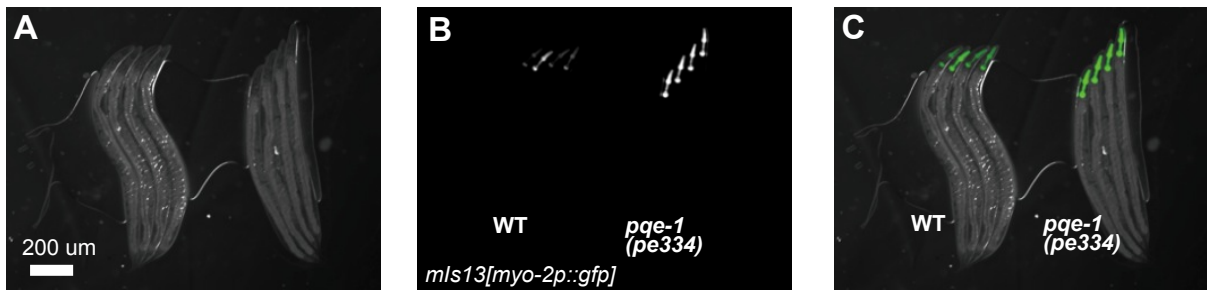

**Figure S6** Enhancement of transgene expression by the *pqe-1* mutation. (A-C) Enhancement of the expression from *mls13[myo-2p::gfp]* by *pqe-1(pe334)* mutation. The bright field image (A), fluorescence image (B), and merged image (C) of *mls13* animals in wild-type and *pqe-1(pe334)* mutant background are shown. Four animals for each genetic background are aligned.
