# Supplementary material
Source: PubMed Central journal article supplement (PMC3385980)
Supplement: supp_2.7.741_FigureS7.pdf [file supp_2.7.741_FigureS7.pdf]

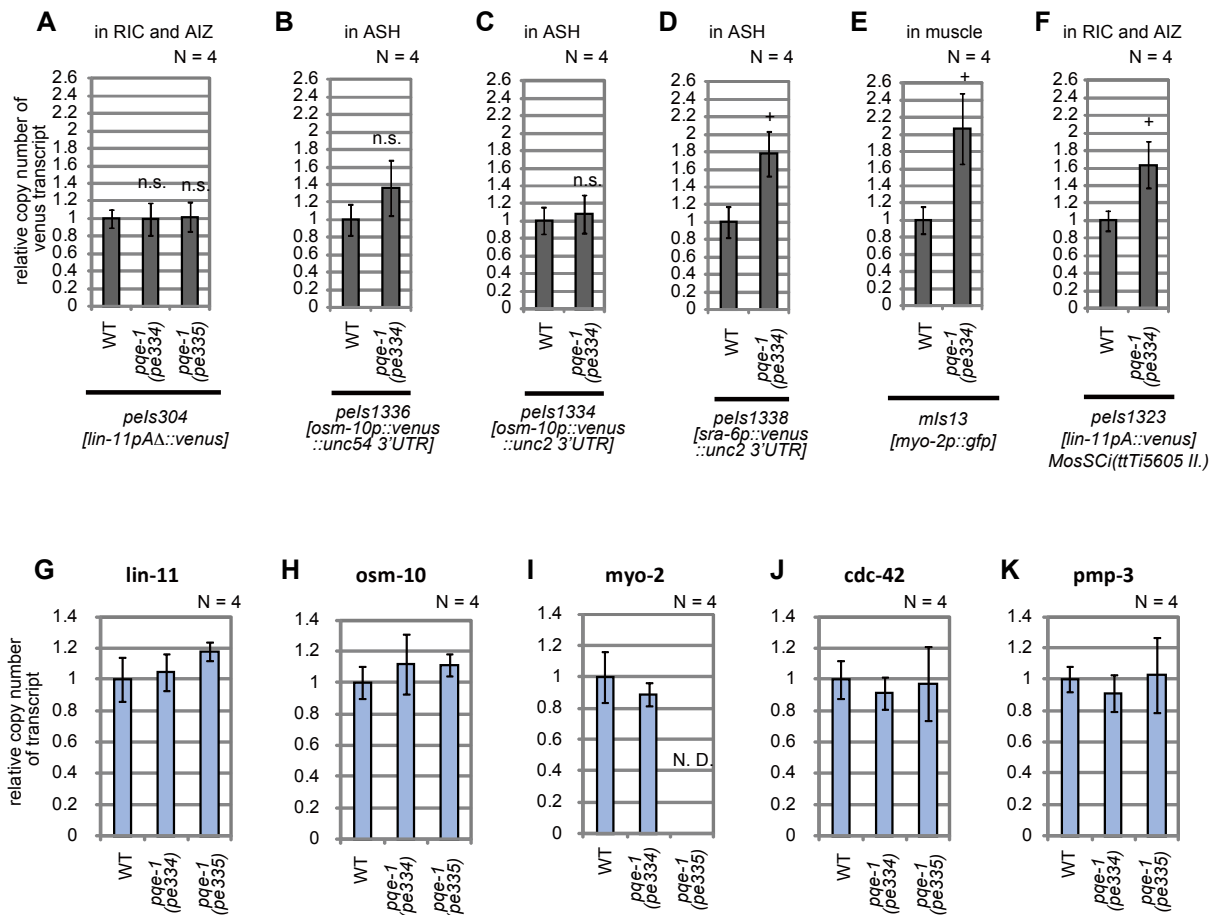

**Figure S7** Quantification of transcripts from L1 larva. (A-F) The copy numbers of venus transcripts were quantified by real-time PCR following reverse transcription. Normalized numbers of transcripts from *pels304[lin-11pAΔ::venus]*, *pels1336[osm-10p::venus::unc-54 3'UTR]*, *pels1334[osm-10p::venus::unc-2 3'UTR]*, *pels1338[sra-6p::venus::unc-2 3'UTR]*, *mIs13[myo2p::venus]*, and *pels1323[lin-11pA::venus](MosSCI)* are shown in (A-F), respectively. (G-K) The copy numbers of transcripts of intrinsic genes were quantified by real-time-PCR following reverse transcription. Normalized numbers of transcripts from *lin-11*, *osm-10*, *myo-2*, *cdc-42*, and *pmp-3* are shown in (G-K), respectively.

(N = 4, N. D. indicates that the result is Not Determined., Error bars represent the S.E.M., + shows significant difference at P < 0.05 and n.s. indicates that they are not significantly different at P < 0.05 by Student's t-test)
